# Supplementary material
Source: Research Square preprint supplement (doi:10.21203/rs.3.rs-9675772/v1)
Supplement: Supplementary file 1 [file 52661d57e4dbd763993b07b4.docx]

**Supplementary Figure S1. Raw read mapping of the assembled complete plastomes and 45S nrDNA in the Green Leaf Tissue and Albino Leaf Tissue of five Cornus cultivars.** (A-B) *C. florida* Cherokee Daybreak; (C-D) *C. kousa* Doudou; (E-F) *C. kousa* Melanie; (G-H) *C. kousa* Tom Wood; (I-J) *C. kousa* Rutban


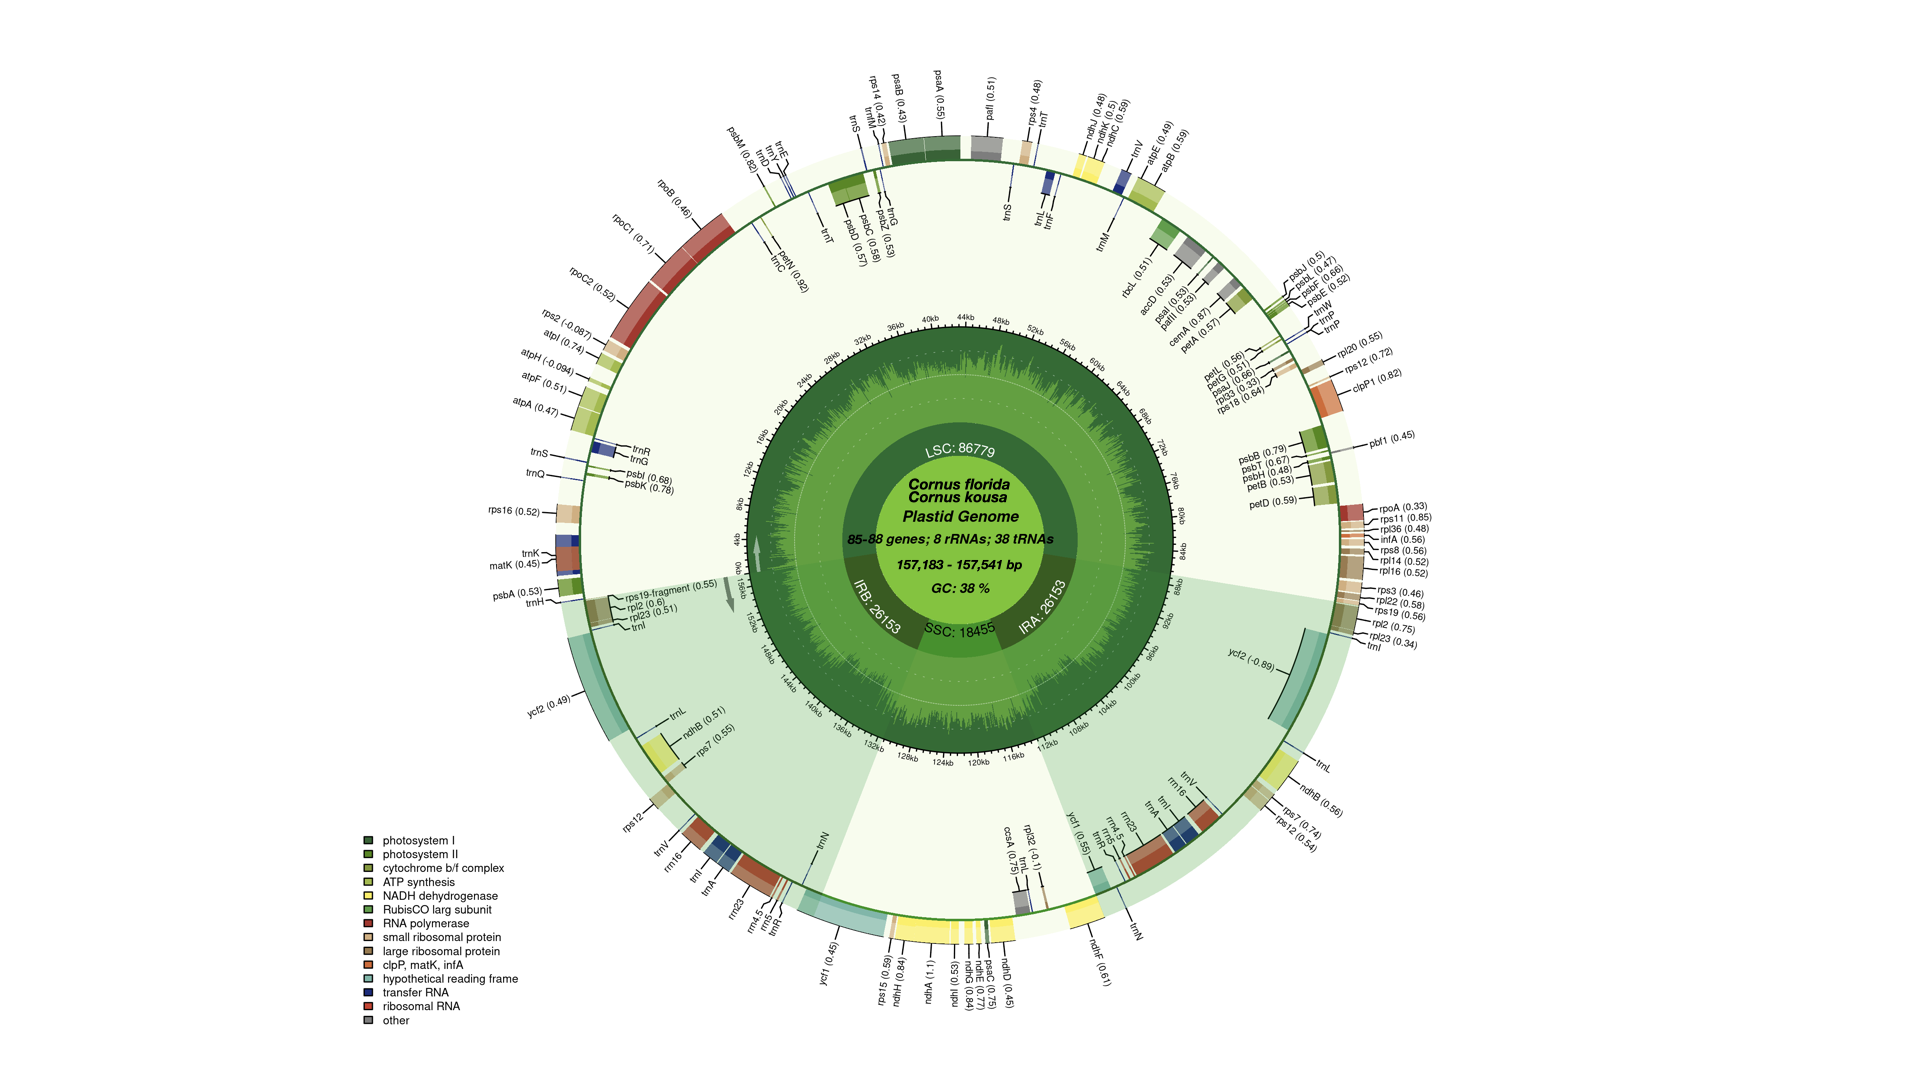


**Supplementary Figure S2. Representative circular map of the *Cornus florida* and *C. kousa* cultivars chloroplast genome.** Colored boxes represent genes. Genes situated within the circle are transcribed in a clockwise orientation, and genes external to the circle are transcribed in a counter-clockwise orientation. Dark green bar graphs in the inner circle indicate GC contents.

**Supplementary Figure S3. Protein models of *matK*, *rpoB* and *ycf3* gene products in the green and albino leaf tissues of *Cornus florida* Cherokee Daybreak, and *C. kousa* Melanie and Doudou.** (A) *C. florida* Cherokee Daybreak *matK* amino acid sequence in green leaf tissue (GLT, top) and albino leaf tissue (ALT, bottom). A zoom of amino acid sequences from 25 to 33 with emphasis on position 29, TYR = tyrosine and ASP = aspartic acid, and their altered structural conformation (B) *C. kousa* Melanie *rpoB* amino acid sequence in GLT (top) and ALT (bottom). A schematic representation of the plastid-encoded RNA polymerase (PEP) β-subunit showing the regions of the protein structure: protrusion, lobe, flap, clamp, gate loop (GL), and fork loop (FL). In the PEP-associated proteins (PEP-PAP) complex, pink, encircled with dotted lines, is the β-subunit of the PEP core. Four RpoB domains are colored blue, light blue, light green, and orange. PAP: PEP-associated proteins (C) *C. kousa* Doudou *ycf3* amino acid sequence in GLT (top) and ALT (inset). Three tetratricopeptide repeats (TPR) domains (blue-grey) in GLT. An illustration of the early assembly of the photosystem I (PSI) with the formation of the PsaA and PsaB heterodimer and assembly factors, Ycf3, Y3IP2, and Pyg7.


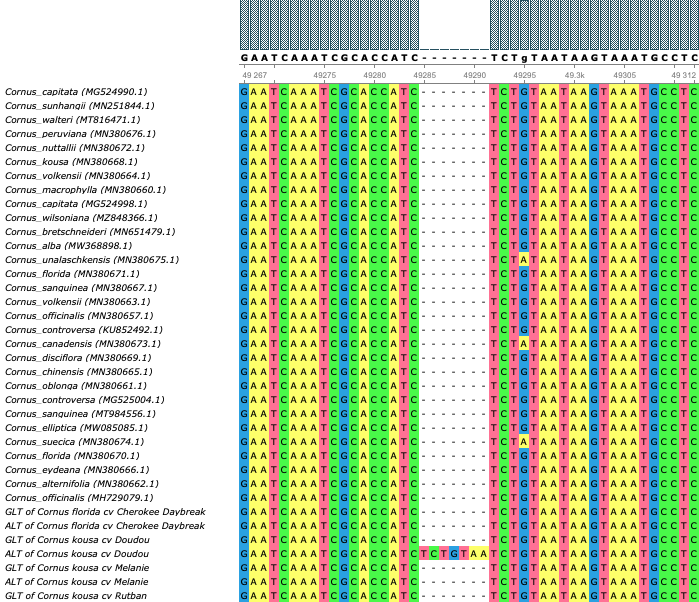

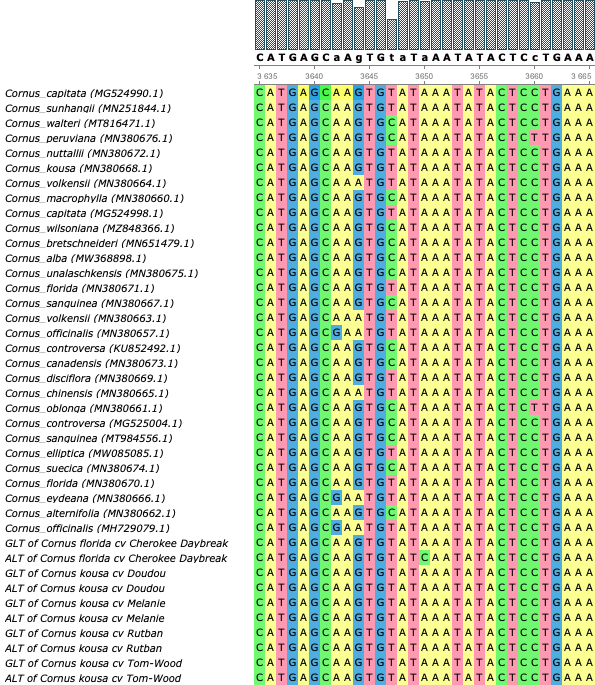

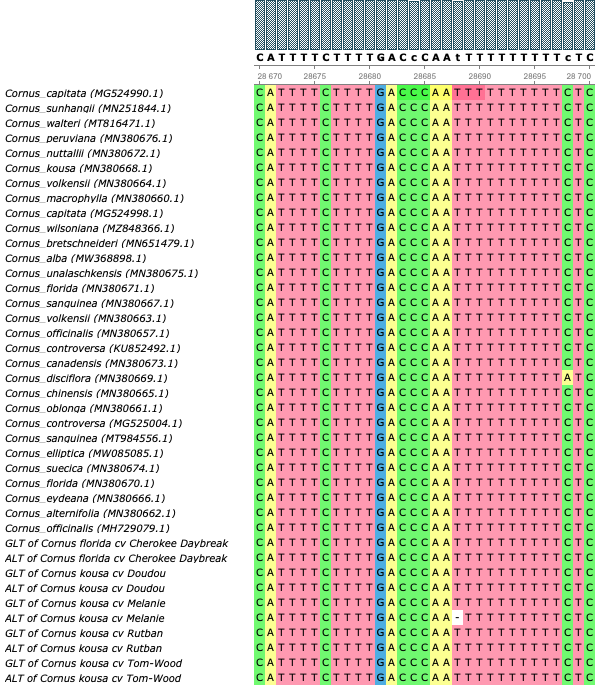


C

B

A

**Supplementary Figure S4. Variations among genus *Cornus* and chimeric plants.** Sequences comparison of the mutation sites among the genus *Cornus* and sequencing samples. (A) *C. florida* cv. Cherokee Daybreak *matK* gene; (B) *C. kousa* cv. Melanie *rpoB* gene; (C) *C. kousa* cv. Doudou *ycf3* gene.

**Supplementary Table S1. NGS data of plastomes and 45S nrDNAs of *Cornus* chimeric cultivars**

| No. | Scientific name | Leaf tissue type* | Sequencing Information | | | | | |
| --- | --- | --- | --- | --- | --- | --- | --- | --- |
| Raw reads | Trimmed reads | Raw bases/bp | Trimmed bases/bp | Average read depth (x) | |
| Plastome | 45S nrDNA |
| 1 | *C. florida*  Cherokee Daybreak | GLT | 4,249,684 | 3,745,575 | 1,279,154,884 | 973,729,027 | 395.59 | 749.17 |
| ALT | 4,181,238 | 3,695,217 | 1,258,552,638 | 962,133,750 | 414.50 | 752.81 |
| 2 | *C. kousa*  Melanie | GLT | 3,928,904 | 3,459,287 | 1,182,600,104 | 903,003,441 | 280.80 | 679.92 |
| ALT | 3,469,940 | 3,036,369 | 1,044,451,940 | 787,214,543 | 413.62 | 547.55 |
| 3 | *C. kousa*  Doudou | GLT | 4,519,482 | 4,099,958 | 1,360,364,082 | 1,139,251,616 | 230.17 | 249.85 |
| ALT | 4,996,568 | 4,613,151 | 1,503,966,968 | 1,274,640,577 | 441.83 | 305.96 |
| 4 | *C. kousa*  Rutban (Aurora®) | GLT | 4,077,444 | 3,640,881 | 1,227,310,644 | 1,005,435,326 | 285.10 | 740.76 |
| ALT | 4,940,968 | 4,557,834 | 1,487,231,368 | 1,261,195,656 | 455.86 | 970.52 |
| 5 | *C. kousa*  Tom Wood | GLT | 5,386,994 | 4,962,063 | 1,621,485,194 | 1,370,622,300 | 290.16 | 905.87 |
| ALT | 5,202,040 | 4,833,603 | 1,565,814,040 | 1,339,045,015 | 626.94 | 762.82 |

*GLT, Green leaf tissue; ALT, Albino leaf tissue

**Supplementary Table S2. Predicting the effects of amino acid substitutions on the GLT and ALT of Cherokee Daybreak *matK***

| Program Name | Amino Acid Substitution | Scores | Prediction | Interpretation | Reference |
| --- | --- | --- | --- | --- | --- |
| PROVEAN | Y29D | -4.690 | Deleterious | Default threshold is -2.5, that is:  -Variants with a score equal to or below -2.5 are considered "deleterious,"  -Variants with a score above -2.5 are considered "neutral." | Choi and Chan, 2015 |
| D29Y | 4.689 | Neutral |

Note: Y, Tyrosine; D, Aspartic acid

**Supplementary Table S3. Designed primer sets to distinguish *Cornus florida* and *C. kousa* cultivars**

| Primer name | Type | Locus | Primer sequence (5’– 3’) | Size/bp | Tm (°C) |
| --- | --- | --- | --- | --- | --- |
| C_HRM1 | HRM | *matK-rpo16* | F: GTACTCTACCGTTGAGTTAGCAAC | CFC 92 / CKM 99 / CKD 97 / CKR 92 / CKT 98 | 58 |
| R: GCCACTGCCTCGTATAATCTC |  |  |
| C_HRM2 | HRM | *psbZ-rps14* | F: GGATTCGGTATAGTTGGCTGTG | CFC 149 / CKM 152 / CKD 151 / CKR 149 / CKT 151 | 58 |
| R: CAAATCCTGTCTCCGCAACA |  |  |
| CF_1 | HRM | *matK* | F: ATGGAGGAATTCCAAAGATATTTAGAAC | CFC-GLT 109 / CFC-ALT 108 / CK 109 | 58 |
| R: AACCACGATCATGAGCAAGTG |  |  |
| CK_1 | HRM | *rpoB* | F: CCCCGCCTACACAAGCAAAT | CKM-GLT 152 / CKM-ALT 151 / CK 152 / CFC 152 | 59 |
| R: AGCTATGGGTTCGAATCTAAGAGAA |  |  |
| CK_ 2 | Dominant | *ycf3* | F: AACTTCACCTTCAACAAGCGT | CKD-GLT 240 / CKD-ALT 247 / CK 240 / CFC 240 | 58 |
| R: GCCTAGATCGCGAATAAATGGAA |  |  |

Note: CFC, *C. florida* Cherokee Daybreak; CKD, *C. kousa* Doudou; CKM, *C. kousa* Melanie; CKR, *C. kousa* Rutban; CKT, *C. kousa* Tom Wood. GLT, Green leaf tissue; ALT, Albino leaf tissue
